# Supplementary material for: A water-stable multi-responsive luminescent Zn-MOF sensor for detecting TNP, NZF and Cr2O72− in aqueous media
Source: Royal Society of Chemistry journal article supplement (doi:10.1039/d0dt03049j), 2020-11-05
Supplement: d0dt03049j1.pdf [file d0dt03049j1.pdf]

## <Electronic Supplementary Information>

# A water-stable multi-responsive luminescent Zn-MOF sensor for detecting TNP, NZF and Cr<sub>2</sub>O<sub>7</sub><sup>2-</sup> in aqueous media

Xiaohe Wang,<sup>a</sup> Mingyuan Lei,<sup>a</sup> Tianjun Zhang,<sup>a</sup> Qingfu Zhang,<sup>\*a</sup> Rufen Zhang,<sup>a</sup> and Ming Yang<sup>b</sup>

<sup>a</sup> College of Chemistry and Chemical Engineering, Liaocheng University, Liaocheng 252059, China.

<sup>b</sup> Fujian Institute of Research on the Structure of Matter, Chinese Academy of Sciences, Fuzhou 350002, China

### X-ray crystallography

Single-crystal X-ray diffraction data were collected on a Bruker SMART-1000 CCD diffractometer with graphite-monochromated Mo K $\alpha$  ( $\lambda = 0.71073$  Å) radiation at room temperature. The structure was solved by direct methods and refined by the full-matrix least-squares methods on  $F^2$  using the SHELX-97 program.<sup>1</sup> All non-hydrogen atoms were refined with anisotropic displacement parameters. The hydrogen atoms on amide groups were found from the different Fourier maps. Crystal and refinement data are summarized in Table S1, and selected bond lengths and bond angles are summarized in Table S2.

**Table S1.** Crystal data and structure refinement parameters for **1**.

|                          |                                                                  |
|--------------------------|------------------------------------------------------------------|
| Empirical formula        | C <sub>35</sub> H <sub>28</sub> N <sub>4</sub> O <sub>7</sub> Zn |
| Formula weight           | 681.98                                                           |
| Temperature (K)          | 298(2)                                                           |
| Wavelength (Å)           | 0.71073                                                          |
| Crystal system           | Monoclinic                                                       |
| Space group              | $P2_1/c$                                                         |
| $a$ (Å)                  | 9.3019(7)                                                        |
| $b$ (Å)                  | 11.1262(8)                                                       |
| $c$ (Å)                  | 30.687(2)                                                        |
| $\beta$ (°)              | 94.077(1)                                                        |
| Volume (Å <sup>3</sup> ) | 3167.9(4)                                                        |
| $Z$                      | 4                                                                |

|                                                     |                                                               |
|-----------------------------------------------------|---------------------------------------------------------------|
| Calculated density (mg·m <sup>-3</sup> )            | 1.430                                                         |
| Absorption coefficient (mm <sup>-1</sup> )          | 0.832                                                         |
| <i>F</i> (000)                                      | 1408                                                          |
| Crystal size (mm)                                   | 0.31 × 0.20 × 0.07                                            |
| Theta range for data collection (°)                 | 2.647 to 25.019                                               |
| Limiting indices                                    | -11 ≤ <i>h</i> ≤ 11, -11 ≤ <i>k</i> ≤ 13, -35 ≤ <i>l</i> ≤ 36 |
| Reflections collected/unique                        | 15711/5567 [ <i>R</i> <sub>int</sub> = 0.067]                 |
| Completeness to $\theta = 25.02^\circ$              | 99.6 %                                                        |
| Data/restraints/parameters                          | 5567/0/426                                                    |
| Goodness-of-fit on <i>F</i> <sup>2</sup>            | 1.077                                                         |
| Final <i>R</i> indices [ <i>I</i> > 2σ( <i>I</i> )] | <i>R</i> <sub>1</sub> = 0.058, <i>wR</i> <sub>2</sub> = 0.137 |

**Table S2.** Selected bond lengths (Å) and angles (°) for **1**.

| Bond lengths |            |             |            |
|--------------|------------|-------------|------------|
| Zn1-O1       | 1.977(3)   | Zn1-O2B     | 1.984(3)   |
| Zn1-O6A      | 1.968(4)   | Zn1-N3      | 2.058(4)   |
| Bond angles  |            |             |            |
| O1-Zn1-O2B   | 107.88(15) | O1-Zn1-O6A  | 111.92(15) |
| O1-Zn1-N3    | 108.89(16) | O2B-Zn1-O6A | 122.30(15) |
| O2B-Zn1-N3   | 102.58(16) | O6A-Zn1-N3  | 102.06(18) |

Symmetry codes, A:  $x+1, -y+1/2, z+1/2$ ; B:  $-x+2, -y+2, -z+2$ .

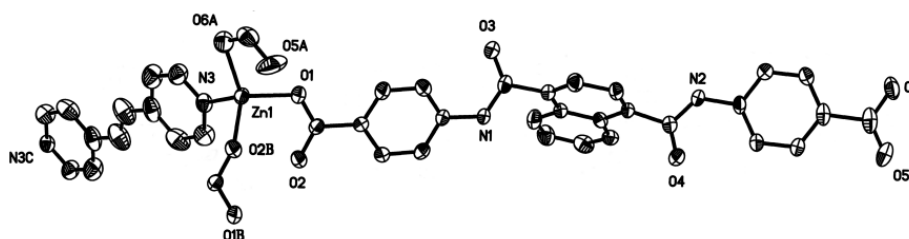

**Fig. S1.** A view of the asymmetric unit of **1** and the local coordination of the Zn(II) cation, the isolated DMF molecule and H atoms are omitted for clarity. Displacement ellipsoids are drawn at the 30% probability level. (Symmetry codes, A:  $x+1, -y+1/2, z+1/2$ ; B:  $-x+2, -y+2, -z+2$ ; C:  $-x+3, -y+3, -z+2$ ).

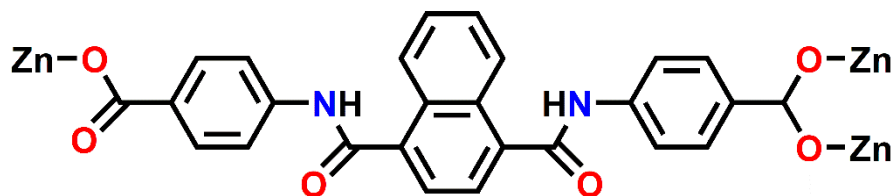

**Fig. S2.** Coordination mode of  $L^{2-}$  ligand in **1**.

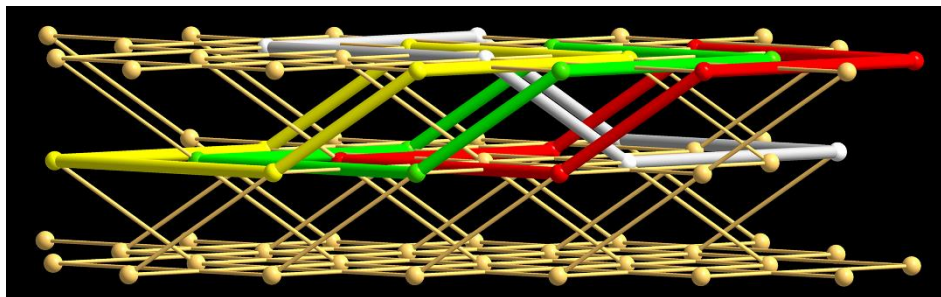

**Fig. S3.** Self-penetrating 6-connected network with  $(4^4 \cdot 6^{10} \cdot 8)$  topology. The self-penetrating shortest circuits and rod are highlighted by red, green, yellow and white.

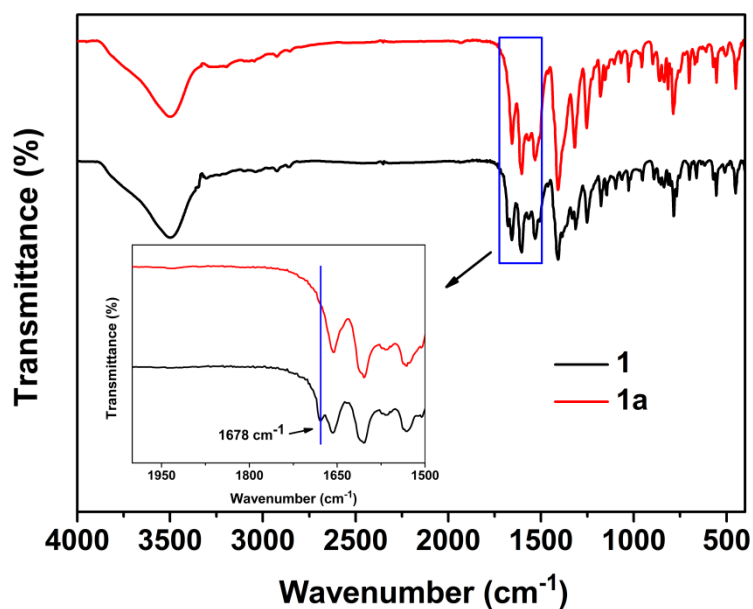

**Fig. S4.** The IR spectra for as-synthesized **1** and activated **1a** samples. Note that the C=O stretching vibration of the DMF was observed at  $1678\text{ cm}^{-1}$  in the as-synthesized sample of **1**; this absorption peak disappeared in the activated sample of **1a**, indicating the complete removals of DMF after activation.

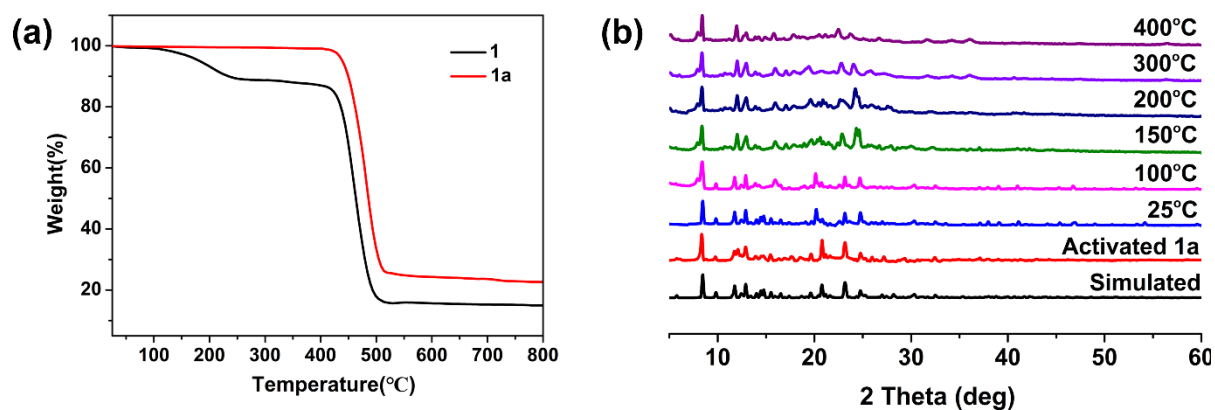

**Fig. S5** (a) The TGA curve of **1** and **1a**. (b) The variable-temperature PXRD patterns for **1a**.

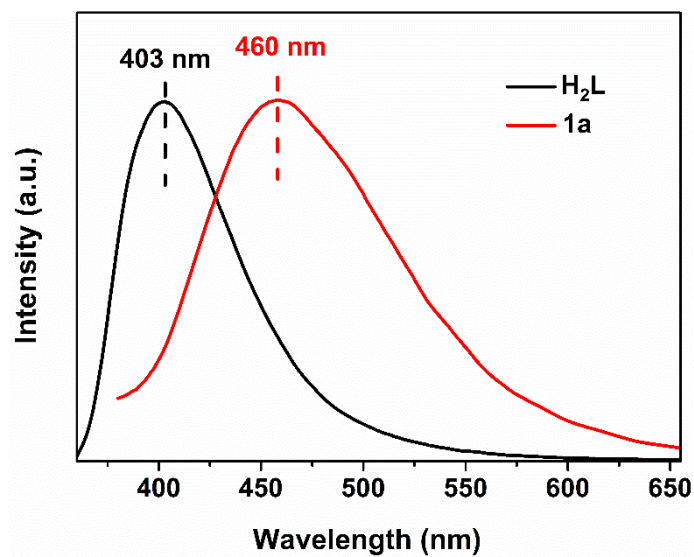

**Fig. S6.** The emission spectrum of  $H_2L$  ligand and complex **1a** dispersed in water at room temperature.

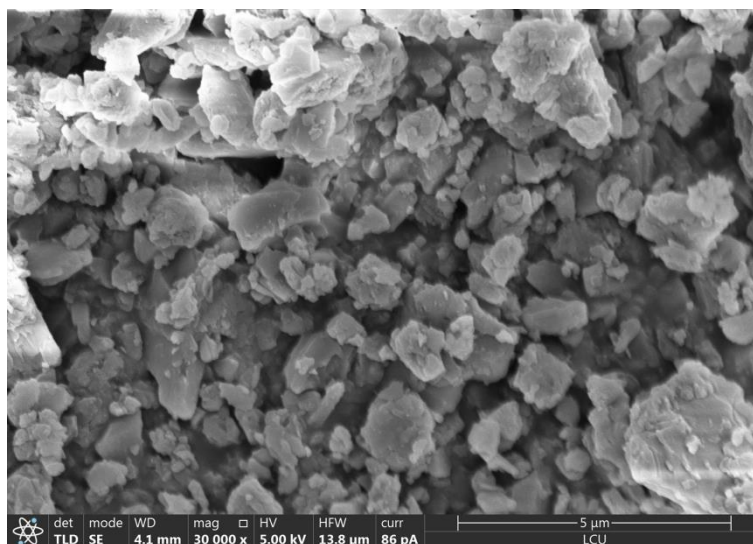

**Fig. S7.** The SEM of the ground samples for the sensing experiment.

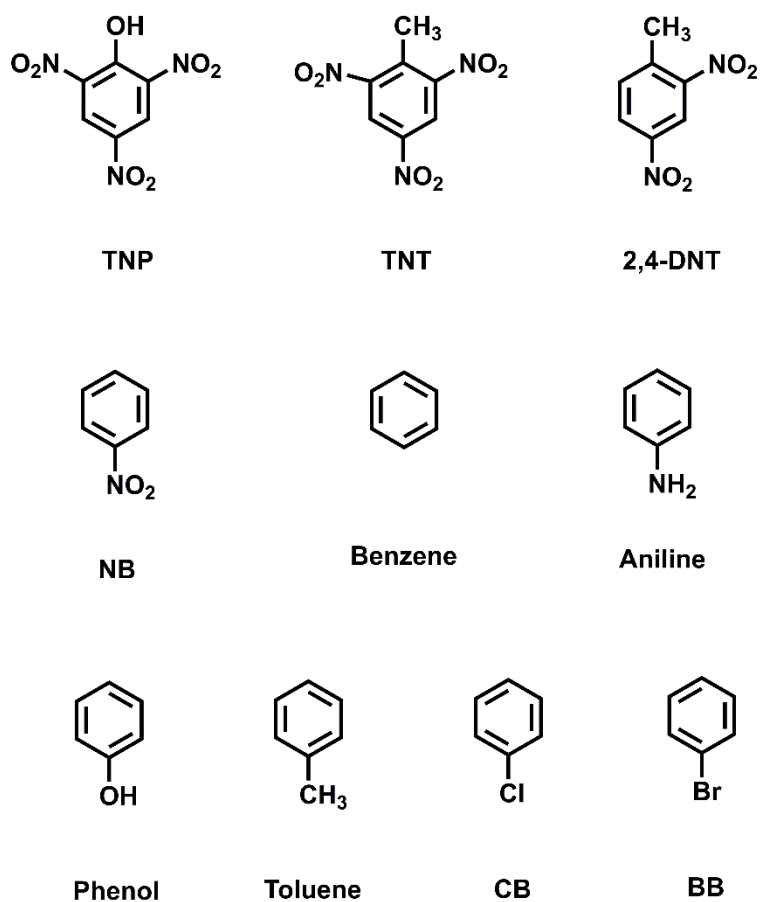

**Fig. S8.** Chemical structures of the investigated aromatic compounds.

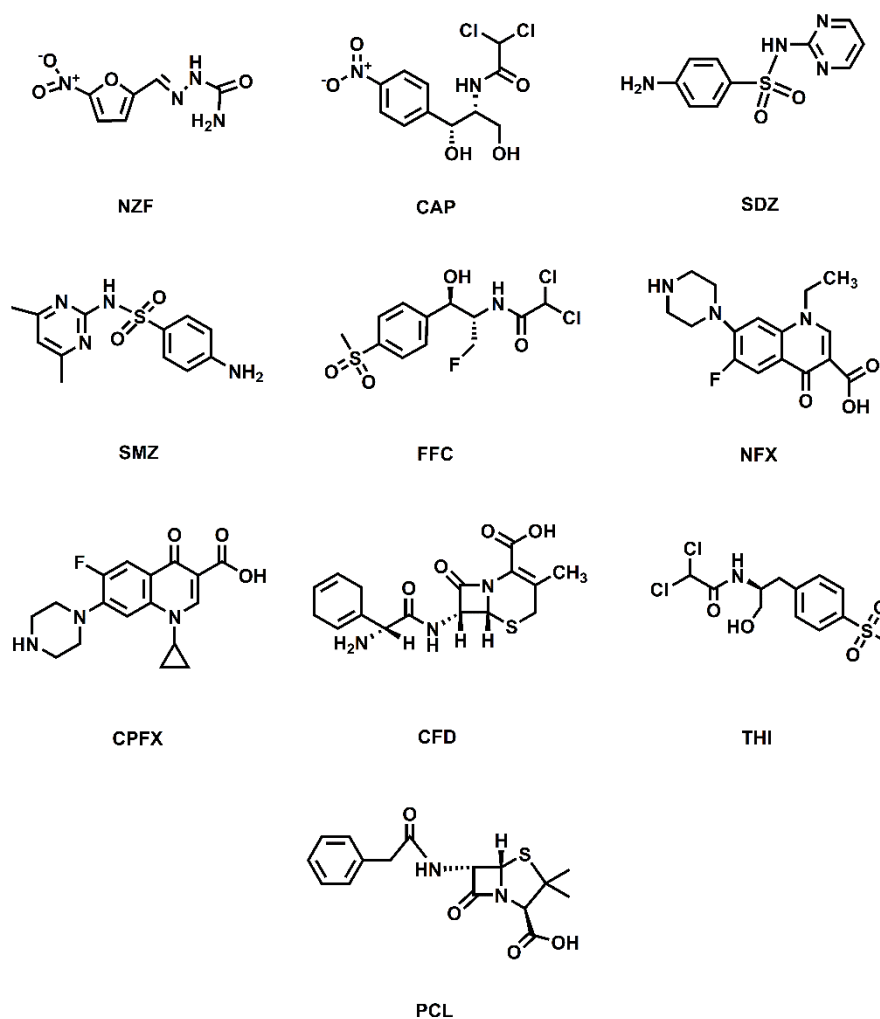

**Fig. S9.** Chemical structures of the investigated antibiotics.

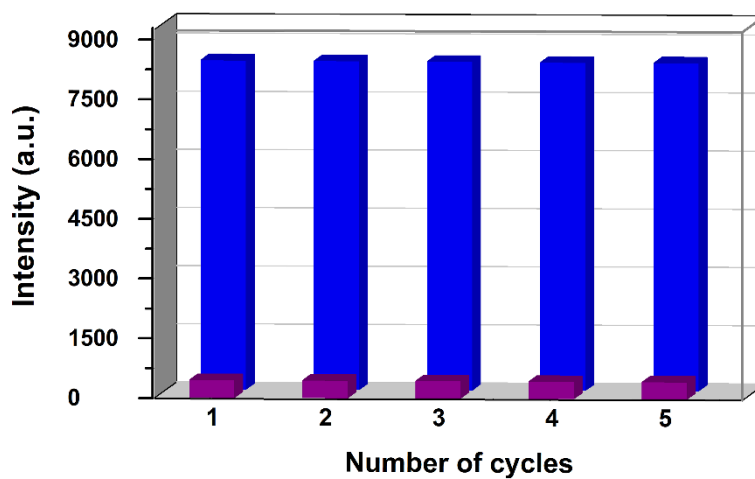

**Fig. S10.** Reversibility experiments of **1a** implemented with TNP.

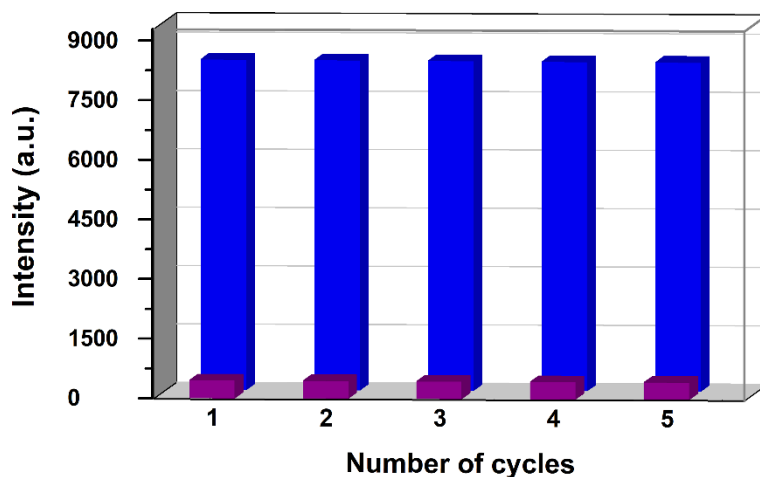

**Fig. S11.** Reversibility experiments of **1a** implemented with NZF.

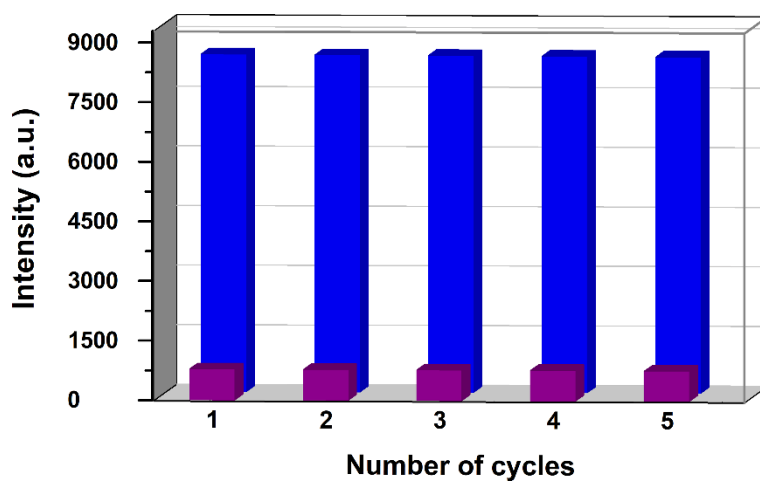

**Fig. S12.** Reversibility experiments of **1a** implemented with Cr<sub>2</sub>O<sub>7</sub><sup>2-</sup> anions.

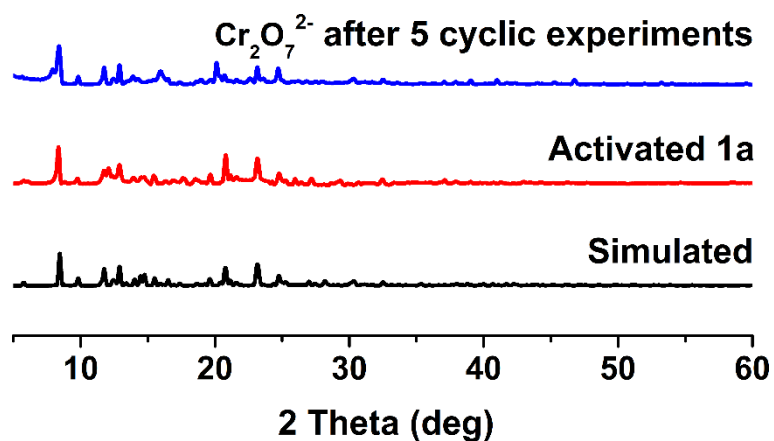

**Fig. S13.** The PXRD patterns for **1a** after 5 cyclic experiments.

**Table S3.** Comparison of the LOD in some reported TNP sensors.

| MOFs                                                                                                                                                | Analyte | LOD (ppb) | Ref.      |
|-----------------------------------------------------------------------------------------------------------------------------------------------------|---------|-----------|-----------|
| $\{[\text{W}_2(\mu_3\text{-S})_6(\mu_4\text{-S})_2\text{Cu}_8(\text{CN})_4(3\text{-abpt})] \cdot \text{CH}_3\text{CN} \cdot \text{H}_2\text{O}\}_n$ | TNP     | 185.6     | 2         |
| $[\text{Zn}(\text{BPDPE})_2(\text{dca})_2]_n$                                                                                                       | TNP     | 167.2     | 3         |
| $[\text{NH}_2(\text{CH}_3)_2][\text{Zn}_4\text{O}(\text{bpt})_2(\text{bdc-NH}_2)_{0.5}] \cdot 5\text{DMF}$                                          | TNP     | 128.3     | 4         |
| UIO-66-Py                                                                                                                                           | TNP     | 103.1     | 5         |
| $\{[\text{Zn}(\text{L})(\text{bpe})_{0.5}] \cdot \text{DMF}\}_n$                                                                                    | TNP     | 61.5      | This work |

**Table S4.** Comparison of the LOD in some reported NZF sensors.

| MOFs                                                                           | Analyte | LOD (ppb) | Ref.      |
|--------------------------------------------------------------------------------|---------|-----------|-----------|
| V102                                                                           | NZF     | 200.0     | 6         |
| $[\text{Cd}_2\text{Na}(\text{L})(\text{BDC})_{2.5}] \cdot 9\text{H}_2\text{O}$ | NZF     | 162.0     | 7         |
| Mg-APDA                                                                        | NZF     | 108.0     | 8         |
| $[\text{Zn}_4\text{O}(\text{BCTPE})_3]$                                        | NZF     | 100.0     | 9         |
| $\{[\text{Zn}(\text{L})(\text{bpe})_{0.5}] \cdot \text{DMF}\}_n$               | NZF     | 87.9      | This work |

**Table S5.** Comparison of the LOD in some reported  $\text{Cr}_2\text{O}_7^{2-}$  sensors.

| MOFs                                                             | Analyte                      | LOD (ppb) | Ref.      |
|------------------------------------------------------------------|------------------------------|-----------|-----------|
| Tb-MOF-A                                                         | $\text{Cr}_2\text{O}_7^{2-}$ | 3909.4    | 10        |
| NUM-5                                                            | $\text{Cr}_2\text{O}_7^{2-}$ | 700.0     | 11        |
| NU-100                                                           | $\text{Cr}_2\text{O}_7^{2-}$ | 388.8     | 12        |
| $\{[\text{Zn}(\text{DCTP})] \cdot 4.2\text{H}_2\text{O}\}_n$     | $\text{Cr}_2\text{O}_7^{2-}$ | 324.0     | 13        |
| $\{[\text{Zn}(\text{L})(\text{bpe})_{0.5}] \cdot \text{DMF}\}_n$ | $\text{Cr}_2\text{O}_7^{2-}$ | 59.2      | This work |



**Table S6.** HOMO and LUMO energies for the selected aromatic compounds and antibiotics calculated by density functional theory (DFT).

| Analytes | HOMO (ev) | LUMO (ev) | Band Gap (ev) |
|----------|-----------|-----------|---------------|
| TNP      | -8.234    | -3.896    | 4.338         |
| TNT      | -8.456    | -3.491    | 4.965         |
| 2,4-DNT  | -8.110    | -2.975    | 5.135         |
| NB       | -7.589    | -2.427    | 5.162         |
| CB       | -6.702    | -0.342    | 6.360         |
| benzene  | -6.699    | 0.099     | 6.798         |
| BB       | -6.580    | -0.343    | 6.237         |
| phenol   | -6.475    | 0.002     | 6.478         |
| toluene  | -6.402    | 0.145     | 6.547         |
| aniline  | -5.388    | 0.251     | 5.639         |
| FFC      | -6.620    | -2.560    | 4.060         |
| CAP      | -6.579    | -3.592    | 2.987         |
| THI      | -6.206    | -2.661    | 3.545         |
| NZF      | -5.905    | -3.724    | 2.181         |
| PCL      | -5.558    | -1.777    | 3.781         |
| SDZ      | -5.538    | -2.260    | 3.278         |
| SMZ      | -5.457    | -1.898    | 3.559         |
| CFD      | -5.190    | -1.990    | 3.200         |
| CPFX     | -4.850    | -1.900    | 2.950         |
| NFX      | -4.700    | -1.890    | 2.810         |

## References

- [1] G. M. Sheldrick, *Acta Cryst.*, 2015, **C71**, 3-8.
- [2] J. F. Zhang, Y. H. Liu, J. Y. Feng, L. P. Gong, M. G. Humphrey, C. Zhang, *Inorg. Chem.*, 2019, **58**, 9749-9755.
- [3] X. L. Zhang, J. S. Hu, B. Wang, Z. Q. Li, S. B. Xu, Y. N. Chen, X. M. Ma, *J. Solid State Chem.*, 2019, **269**, 459-464.
- [4] S. H. Xing, Q. M. Bing, H. Qi, J. Y. Liu, T. Y. Bai, G. H. Li, Z. Shi, S. H. Feng, R. R. Xu, *ACS Appl. Mater. Interfaces*, 2017, **9**, 23828-23835.
- [5] Y. L. Tang, H. F. Wu, J. M. Chen, J. L. Jia, J. P. Yu, W. Xu, Y. Y. Fu, Q. G. He, H. M. Cao, J. G. Cheng, *Dyes and Pigments.*, 2019, **167**, 10-15.
- [6] S. L. Hou, J. Dong, X. L. Jiang, Z. H. Jiao, C. M. Wang, B. Zhao, *Anal. Chem.*, 2018, **90**, 1516-1519.
- [7] D. Zhao, X. H. Liu, Y. Zhao, P. Wang, Y. Liu, M. Azam, S. I. Al-Resayes, Y. Lu, W. Y. Sun, *J. Mater. Chem. A*, 2017, **5**, 15797-15807.
- [8] N. Xu, Q. H. Zhang, B. S. Hou, Q. Cheng, G. A. Zhang, *Inorg. Chem.*, 2018, **57**, 13330-13340.
- [9] X. G. Liu, C. L. Tao, H. Q. Yu, B. Chen, Z. Liu, G. P. Zhu, Z. J. Zhao, L. Shen, B. Z. Tang, *J. Mater. Chem. C*, 2018, **6**, 2983-2988.
- [10] H. H. Yu, J. Q. Chi, Z. M. Su, X. Li, J. Sun, C. Zhou, X. L. Hu, Q. Liu, *CrystEngComm*, 2020, **22**, 3638-3643.
- [11] Z. Q. Yao, G. Y. Li, J. Xu, T. L. Hu, X. H. Bu, *Chem.- Eur. J.*, 2018, **24**, 3192-3198.
- [12] Z. J. Lin, H. Q. Zheng, H. Y. Zheng, L. P. Lin, Q. Xin, R. Cao, *Inorg. Chem.*, 2017, **56**, 14178-14188.
- [13] Y. Shi, T. Q. Song, C. S. Cao, B. Zhao, *CrystEngComm*, 2018, **20**, 6040-6045.
